# Supplementary material for: Graphene plasmonics for ultrasensitive imaging-based molecular fingerprint detection
Source: Royal Society of Chemistry journal article supplement (doi:10.1039/d3tc00407d), 2023-01-01
Supplement: d3tc00407d1.pdf [file d3tc00407d1.pdf]

# Supplemental Information

## Graphene plasmonics for ultrasensitive imaging-based molecular fingerprints detection

Chengdong Tao,<sup>a</sup> Chuanbao Liu,<sup>b,\*</sup> Yongliang Li,<sup>a</sup> Lijie Qiao,<sup>a</sup> Ji Zhou,<sup>c</sup> and Yang Bai<sup>a,†</sup>

<sup>a</sup> Beijing Advanced Innovation Center for Materials Genome Engineering, Institute for Advanced Materials and Technology, University of Science and Technology Beijing, Beijing 100083, China.

<sup>b</sup> School of Materials and Engineering, University of Science and Technology Beijing, Beijing 100083, China.

<sup>c</sup> State Key Laboratory of New Ceramics and Fine Processing, School of Materials Science and Engineering, Tsinghua University, Beijing 100084, China.

Corresponding authors: \*[cbliu@ustb.edu.cn](mailto:cbliu@ustb.edu.cn); †[baiy@mater.ustb.edu.cn](mailto:baiy@mater.ustb.edu.cn)

### Supplemental Note 1. The surface conductivity of graphene.

The surface conductivity  $\sigma_s$  of graphene includes the contribution of both intraband and interband electronic transitions:

$$\begin{aligned}\sigma_s(\omega) &= \sigma_s^{\text{intra}}(\omega) + \sigma_s^{\text{inter}}(\omega) \\ \sigma_s^{\text{intra}}(\omega) &= \frac{2ie^2k_B T}{\pi\hbar^2(\omega + i\tau^{-1})} \ln \left[ 2 \cosh \left( \frac{E_F}{2k_B T} \right) \right] \\ \sigma_s^{\text{inter}}(\omega) &= \frac{e^2}{4\hbar} \left[ \frac{1}{2} + \frac{1}{\pi} \arctan \left( \frac{\hbar\omega - E_F}{2k_B T} \right) - \frac{i}{2\pi} \ln \frac{(\hbar\omega + E_F)^2}{(\hbar\omega - E_F)^2 + (2k_B T)^2} \right]\end{aligned}\quad (1)$$

,

in which  $k_B$  is the Boltzmann's constant,  $\hbar$  is the reduced Planck's constant,  $\omega$  is the angular frequency,  $\tau$  is the relaxation time, and  $E_F$  is the Fermi level of graphene.

**Supplemental Note 2. The effective permittivity of A/G-IgG protein bilayer.**

The effective permittivity of A/G-IgG protein bilayer is described as a function of filling factor  $f$  according to the Maxwell-Garnet equivalent medium theory,

$$\varepsilon_{eff} = f \cdot \varepsilon_p + (1 - f) \quad (2)$$

Here,  $\varepsilon_p$  is the relative permittivity of A/G-IgG protein bilayer. The effective permittivities of protein bilayer with different filling factors are shown in Figure S2.

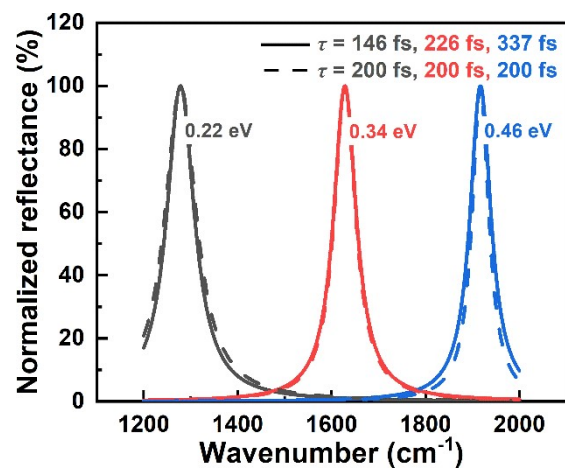

**Fig. S1.** Under different Fermi levels, the normalized reflectance spectra at varying relaxation times and constant relaxation time 200 fs, respectively.

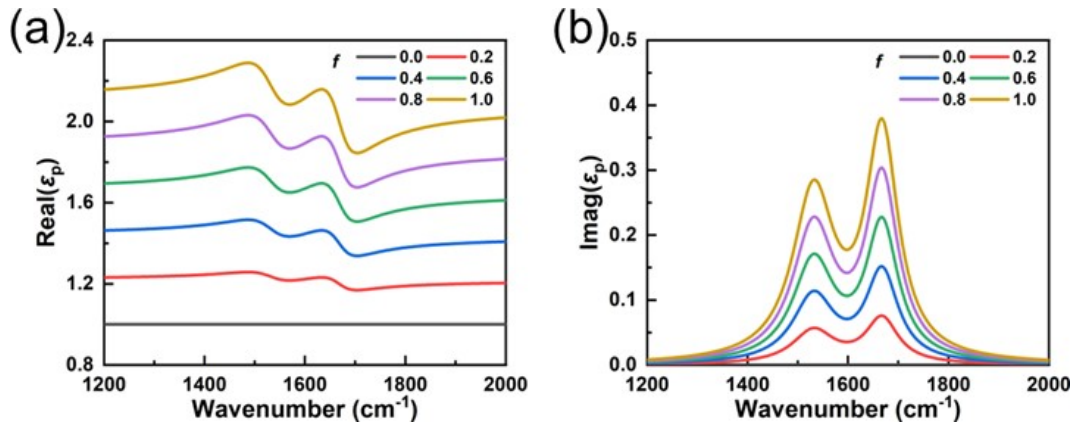

**Fig. S2.** The effective permittivity  $\epsilon_p$  of A/G-IgG protein bilayer. (a) The real part of  $\epsilon_p$ . (b) The imaginary part of  $\epsilon_p$ .

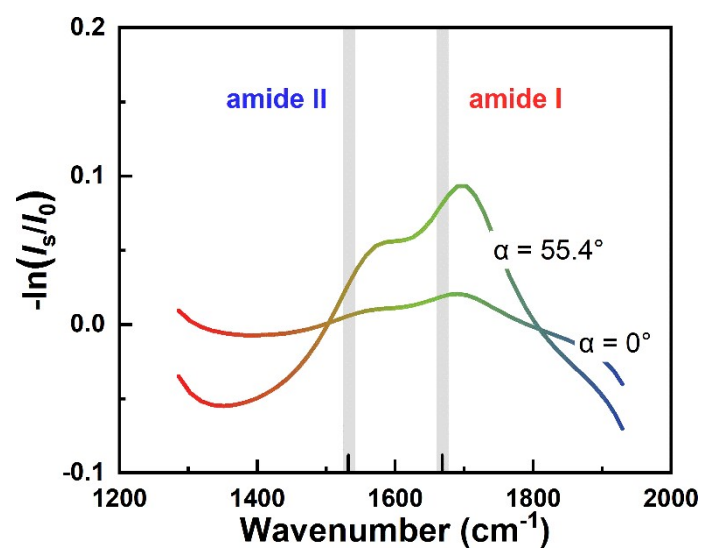

**Fig. S3.** The absorption signals calculated from light intensity spectra  $-\ln(I_s/I_0)$  with incident angle  $\alpha = 0^\circ$  and  $\alpha = 55.4^\circ$ .

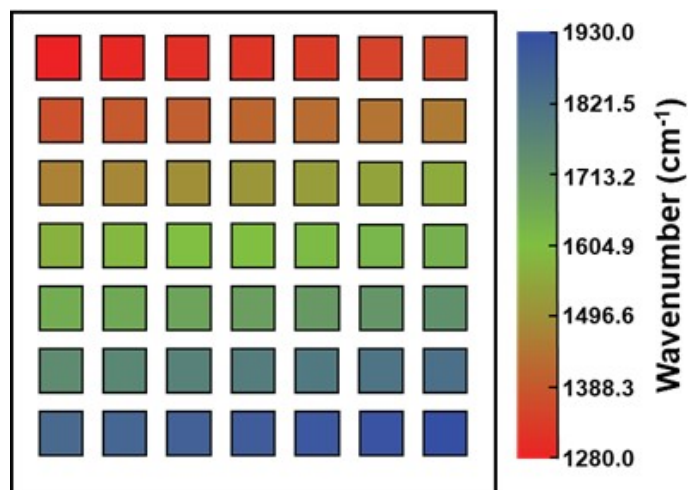

**Fig. S4.** Wavenumbers of each color block for imaging-based fingerprints detection of A/G-IgG protein bilayer.

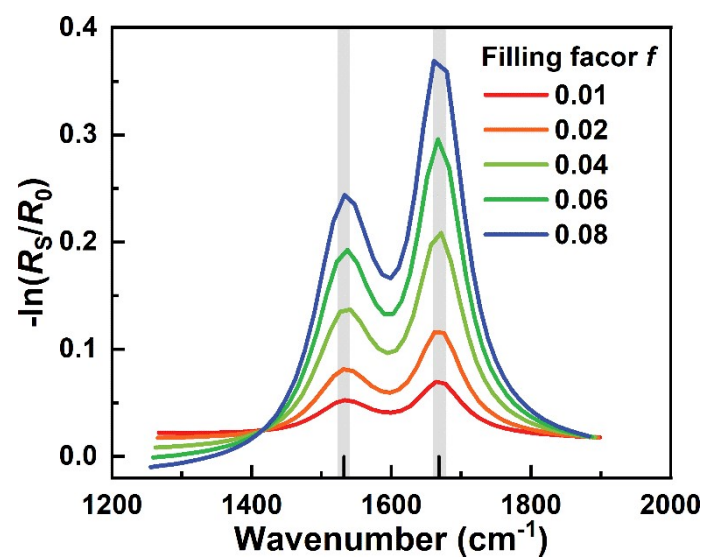

**Fig. S5.** The absorption bands of different amounts of protein physisorption revealed by the absorbance signals calculated from reflectance spectra  $-\ln(R_s/R_0)$ .

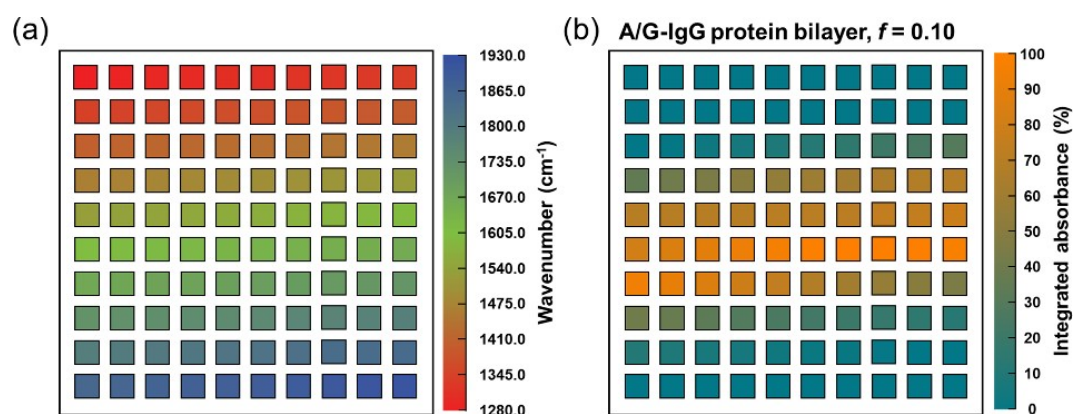

**Fig. S6.** The improved wavenumber's resolution in imaging-based fingerprints detection of A/G-IgG protein bilayer. (a) Wavenumbers of each color block for imaging-based fingerprints detection of A/G-IgG protein bilayer. (b) Schematic of integrated absorbance map after 10% protein bilayer physisorption.

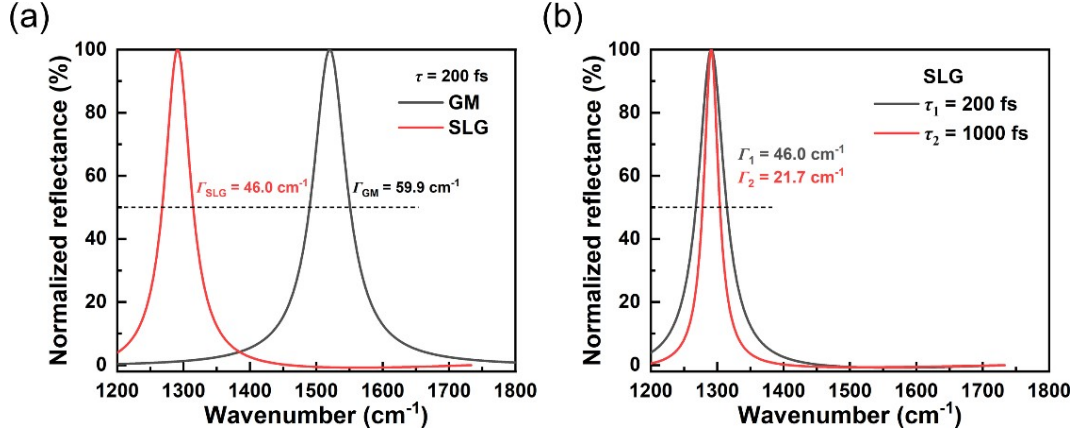

**Fig. S7.** The normalized reflectance spectra of the graphene metasurface and the graphene/silicon hybrid structure under the same relaxation time 200 fs. (b) The normalized reflectance spectra of the graphene/silicon hybrid structure at different relaxation times.

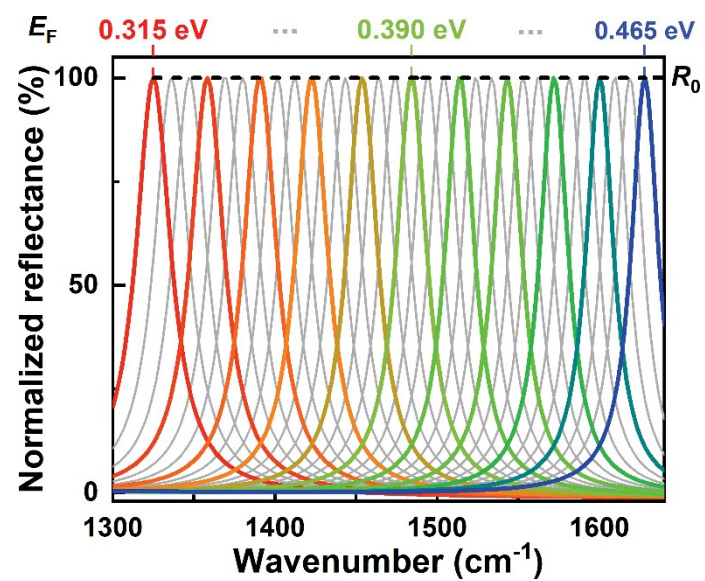

**Fig. S8.** Normalized reflectance spectra of the graphene/silicon grating hybrid structure with different Fermi levels.

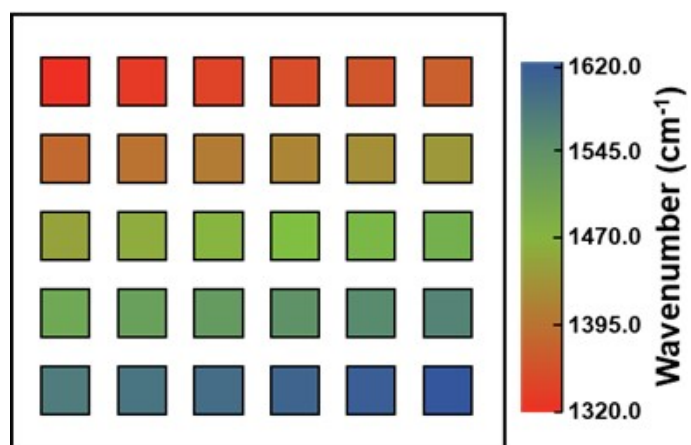

**Fig. S9.** Wavenumbers of each color block for imaging-based fingerprint detection of PE polymer layer.

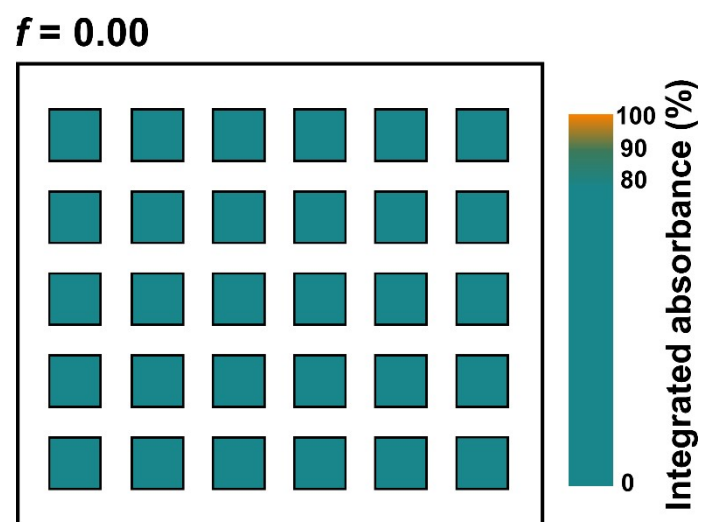

**Fig. S10.** Schematic of the integrated absorbance signal before PE molecule physisorption.

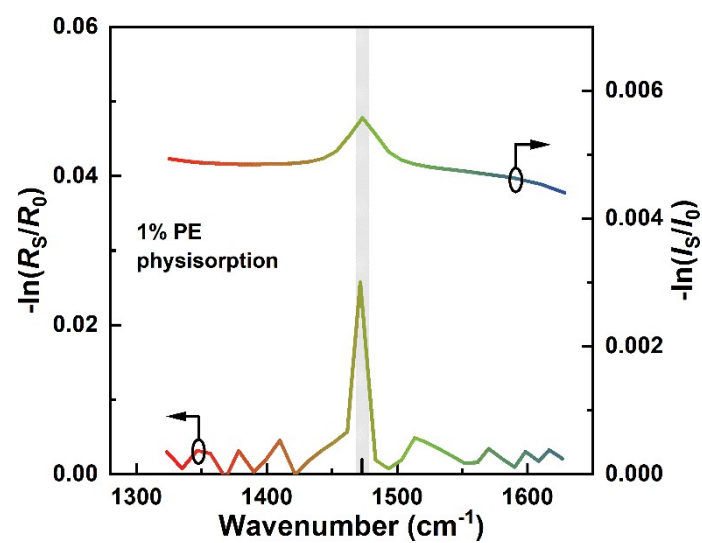

**Fig. S11.** The absorption signature of 1% PE layer physisorption revealed by absorbance signal calculated from reflectance spectra  $-\ln(R_s/R_0)$  and absorbance signal calculated from light intensity spectra  $-\ln(I_s/I_0)$ , respectively.

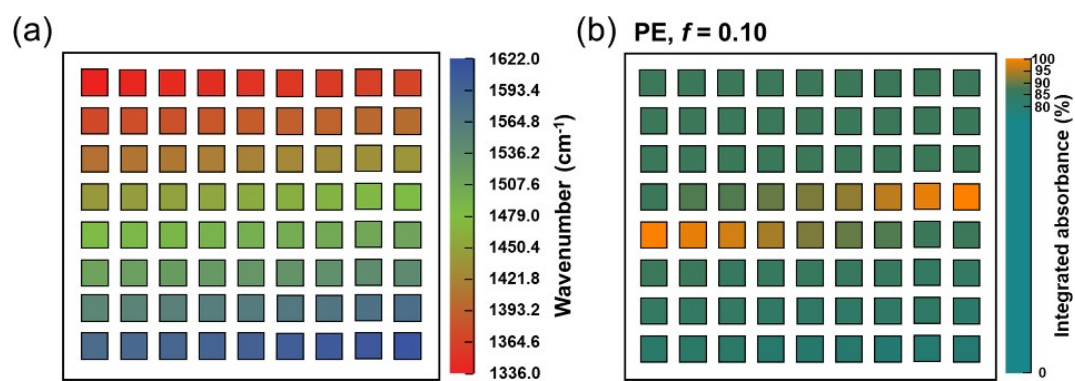

**Fig. S12.** The improved wavenumber's resolution in imaging-based fingerprint detection of PE. (a) Wavenumbers of each color block for imaging-based fingerprints detection of PE. (b) Schematic of integrated absorbance map after 10% PE physisorption.
